# Supplementary material for: A novel experimental design for the measurement of metacarpal bone loading and deformation and fingertip force
Source: PeerJ. 2018 Sep 11;6:e5480. doi: 10.7717/peerj.5480 (PMC6138040; doi:10.7717/peerj.5480)
Supplement: Supplemental Information 1 — This table presents the force and strain data measured from the three specimens in two tendon path conditions, i.e. parallel and semi-physiological conditions. The force experienced by the third metacarpal bone (Fmc) is presented in the proximal(+)/distal(−), dorsal(+)/volar(−), and radial(+)/ulnar(−) directions with respect to the metacarpal bone. The strain gauge (SG) measurement was performed at three sides of the bone, i.e. radial-palmar, dorsal, and ulnar-palmar sides. The fingertip force (Ftip) is presented in the proximal(+)/distal(−), dorsal(+)/volar(−), and radial(+)/ulnar(−) directions with respect to the distal phalanx. [file peerj-06-5480-s001.xlsx]

## Sheet: 工作表1
Specimen	Tendon path	Fmc_PD (N)	Fmc_DV (N)	Fmc_RU (N)	SG_R (micro-strain)	SG_D (micro-strain)	SG_U (micro-strain)	Ftip_PD (N)	Ftip_DV (N)	Ftip_RU (N)
H01	parallel	4.14493	-0.509296	-0.096192	-21.228	23.6749	-1.04815	-0.498315	-0.819142	0.371842
H02	parallel	3.63499	-0.637833	0.572648	-38.5292	38.2509	57.7629	-0.347073	-0.886136	-0.59693
H03	parallel	3.78694	-0.600331	0.529866	-15.9006	35.5614	13.2533	-0.320508	-0.744362	-0.439654
H01	semi-physiological	5.42608	0.729154	-0.437278	10.3217	-39.1637	-13.4634	-0.466234	-1.54764	0.501079
H02	semi-physiological	5.6093	1.84784	0.921604	-20.1821	-120.032	25.7563	-0.338222	-1.39918	-0.681151
H03	semi-physiological	4.84293	1.11011	0.77037	-45.5154	-36.8699	23.0462	-0.183816	-1.59435	-0.59263
